# Supplementary material
Source: publisher figshare collection journal article supplement (https://tandf.figshare.com/ndownloader/files/31383013)
Supplement: Supplementary file 1 [file 31383013]

**Arctic Answers Knowledge Pyramid**

*“Can Extreme Arctic Climate Change be Avoided with Cost Effective Mitigation?”*

*By Dee Williams*

**
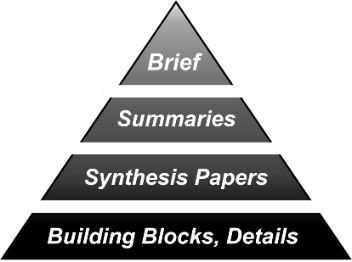
Arctic Answers Briefs** answer questions about Arctic environmental change that are framed for policy makers. Each Brief concisely conveys the state of the science. For supporting information and further reading, the **Knowledge Pyramid** of the state of the science and knowledge is presented below with the references from the Brief at the apex, built upon layers of references of increasingly more technical information: summaries, synthesis papers, and the building blocks of detailed basic research and technical academic studies.

**Key References:**

AMAP. 2021. Arctic Climate Change Update 2021: Key Trends and Impacts. Summary for Policy-makers. Arctic Monitoring and Assessment Programme (AMAP), Tromsø, Norway. 16 pp.

Johnson, L.T., and C. Hope. 2012. The social cost of carbon in U.S. regulatory impact analyses: an introduction and critique. *Journal of Environmental Studies and Sciences.* D <https://doi.org/10.1007/s13412-012-0087-7>

National Academy of Sciences, Engineering and Medicine (NAS). 2017. *Valuing climate damages: Updating estimation of the social cost of carbon dioxide.* Washington, DC: The National Academies Press. DOI: 10.17226/24651.

Overland, J.E., M. Wang, J.E. Walsh, and J.C. Stroeve. 2013. Future Arctic climate changes: Adaptation and mitigation timescales. *Earth’s Future* 2(2): 68-74. <https://doi.org/10.1002/2013EF000162>

Stocker, T.F. (eds.) et al. 2013. IPCC, 2013: Summary for Policymakers. In *Climate Change 2013: The Physical basis.* New York, NY: Cambridge University Press. DOI:10.1007/CB09781107415324.004.

Washington, W.M., R. Knutti, G.A. Meehl, H. Teng, C. Tebaldi, D., Lawrence, L. Buja, and W.G. Strand. 2009. How much climate change can be avoided by mitigation? *Geophysical Research Letters* 36: l08703. <https://doi.org/10.1029/2008GL037074>

**Summaries:**

Arctic Monitoring and Assessment Programme (AMAP) Working Group. 2017. Snow, water, ice and permafrost in the Arctic: Summary for policy-makers. Arctic Monitoring and Assessment Programme. Oslo, Norway. 20pp.

Carleton, T., and M. Greenstone. 2021. Updating the United States government's social cost of carbon. University of Chicago, Becker Friedman Institute for Economics Working Paper 2021-04. BFI_WP_202104_Final.pdf (uchicago.edu)

Kalkuhl, M., and L. Wenz. 2020. The impact of climate conditions on economic production. Evidence from a Global Panel of Regions. *Journal of Environmental Economics and Management* 103: 102360. <https://doi.org/10.1016/j.jeem.2020.102360>

Revesz, R.L., P.H. Howard, K. Arrow, L.H. Goulder, R.E. Kopp, M.A. Livermore, M. Oppenheimer, and T. Sterner. 2014. Global warming: Improve economic models of climate change. *Nature* 508(7495): 173-175. <https://doi.org/10.1038/508173a>

Sand, M., T.K. Berntsen, K. von Salzen, M.G. Flanner, J. Langner, and D.G. Victor. 2016. Response of Arctic temperature to changes in emissions of short-lived climate forcers. *Nature Climate Change* 6(3): 286-290. <https://doi.org/10.1038/nclimate2880>.

**Syntheses:**

# Livermore, M.A., and R.L. Revesz. 2020. *Reviving rationality: saving cost-benefit analysis for the sake of the environment and our health*. New York, NY: Oxford University Press, USA.

# Nordhaus, W.D. 2017. Revisiting the social cost of carbon. *Proceedings of the National Academy of Sciences* 114(7): 1518-1523. <https://doi.org/10.1073/pnas.1609244114>

Thoman, R.L., J. Richter-Menge, and M.L. Druckenmiller (eds.). 2020. *NOAA Arctic Report Card 2020: Executive Summary*. <https://doi.org/10.25923/mn5p-t549>.

**Building Blocks:**

Allen, Myles, O. P. Dube, W. Solecki, F. Aragón-Durand, W. Cramer, S. Humphreys, M. Kainuma, J. Kala, N. Mahowald, and Y. Mulugetta. 2019. Technical Summary. In: *Global warming of 1.5°C. An IPCC Special Report on the impacts of global warming of 1.5°C above pre-industrial levels and related global greenhouse gas emission pathways, in the context of strengthening the global response to the threat of climate change, sustainable development, and efforts to eradicate poverty*, <https://www.ipcc.ch/site/assets/uploads/sites/2/2018/12/SR15_TS_High_Res.pdf>.

# Berman, M. and J. Schmidt. 2019. Economic effects of climate change in Alaska. *Weather, Climate, and Society* 11: 245-258. <https://doi.org/10.1175/WCAS-D-18-0056.1> <https://journals.ametsoc.org/view/journals/wcas/11/2/wcas-d-18-0056_1.xml>

IPCC, 2018. Global Warming of 1.5°C. An IPCC Special Report on the impacts of global warming of 1.5°C above pre-industrial levels and related global greenhouse gas emission pathways, in the context of strengthening the global response to the threat of climate change, sustainable development, and efforts to eradicate poverty. Masson-Delmotte, V., P. Zhai, H.-O. Pörtner, D. Roberts, J. Skea, P.R. Shukla, A. Pirani, W. Moufouma-Okia, C. Péan, R. Pidcock, S. Connors, J.B.R. Matthews, Y. Chen, X. Zhou, M.I. Gomis, E. Lonnoy, T. Maycock, M. Tignor, and T. Waterfield (eds.).

Interagency Working Group on Social Cost of Carbon. 2010. Technical Support Document: Social Cost of Carbon for Regulatory Impact Analysis Under Executive Order 12866.

Interagency Working Group on Social Cost of Carbon. 2016. Technical Support Document: Technical Update of the Social Cost of Carbon for Regulatory Impact Analysis Under Executive Order 12866.

Kopp, R. E., and B.K. Mignone. 2012. The U.S. government’s social cost of carbon estimates after their first two years: Pathways for improvement. *Economics: The Open-Access, Open-Assessment E-Journal* 6(1). <https://doi.org/10.5018/economics-ejournal.ja.2012-15>*.*

Le Quéré, C., R.B. Jackson, M.W. Jones, A.J. Smith, S. Abernethy, R.M. Andrew, A.J. De-Gol, D.R. Willis, Y. Shan, J.G. Canadell, and P. Friedlingstein. 2020. Temporary reduction in daily global CO2 emissions during the COVID-19 forced confinement. *Nature Climate Change* 10:647–653. <https://doi.org/10.1038/s41558-020-0797-x> .

Melvin, A.M., P. Larsen, B. Boehlert, J.E. Neumann, P. Chinowsky, X. Espinet, J. Martinich, M. S. Baumann, L. Rennels, A. Bothner, D.J. Nicolsky, S.S. Marchenko. 2017. Climate damages to Alaska public infrastructureand the economics of proactive adaptation. *Proceedings of the National Academy of Sciences* 114(2): E122-E131. DOI: 10.1073/pnas.1611056113. <https://www.pnas.org/content/114/2/E122>.

Stern, N. 2007. *The Economics of Climate Change: The Stern Review.* Cambridge, UK: Cambridge University Press.

Stocker, T.F. (eds.) et al. 2013. IPCC, 2013: Summary for Policymakers. In *Climate Change 2013: The Physical basis.* New York, NY: Cambridge University Press. DOI:10.1007/CB09781107415324.004.

University of Alaska Fairbanks (UAF) Institute of Northern Engineering, U.S. Army Corps of Engineers Alaska District, U.S. Army Corps of Engineers (USACE) Cold Regions Research and Engineering Laboratory. 2019. Statewide threat assessment— identification of threats from erosion, flooding, and thawing permafrost in remote Alaska communities: Report #INE 19.03, 99 p. <https://www.denali.gov/wp-content/uploads/2019/11/Statewide-ThreatAssessment-Final-Report-20-November-2019.pdf>
